# 1 **A Temporal Transcriptional Map of Human Natural Killer Cell**

## 2 **Differentiation**

3

4 Aline Pfefferle<sup>1†</sup>, Herman Netskar<sup>2,3†</sup>, Eivind Heggernes Ask<sup>2,3</sup>, Susanne Lorenz<sup>4</sup>, Jodie P.

5 Goodridge<sup>2,3</sup>, Ebba Sohlberg<sup>1</sup>, Trevor Clancy<sup>2,3‡</sup>, Karl-Johan Malmberg<sup>1,2,3\*‡</sup>

6

7 <sup>1</sup>Center for Infectious Medicine, Department of Medicine Huddinge, Karolinska Institutet,

8 Stockholm, Sweden. <sup>2</sup>Department of Cancer Immunology, Institute for Cancer Research, Oslo

9 University Hospital, Oslo, Norway. <sup>3</sup>The KG Jebsen Center for Cancer Immunotherapy, Institute

10 of Clinical Medicine, University of Oslo, Oslo, Norway. <sup>4</sup>Department of Tumor Biology,

11 Institute for Cancer Research, Oslo University Hospital, Oslo, Norway.

12

13 \*Corresponding author.

14 †Shared first author.

15 ‡Shared last author.

## 16 **Abstract**

17 Natural killer cell repertoires are functionally diversified as a result of differentiation, homeostatic  
18 receptor-ligand interactions and adaptive responses to viral infections. However, the regulatory  
19 gene-circuits that define the manifold cell states and drive NK cell differentiation have not been  
20 clearly resolved. Here, we performed single-cell RNA sequencing of 26,506 cells derived from  
21 sorted phenotypically-defined human NK cell subsets to delineate a tightly coordinated  
22 differentiation process from a small population of CD56<sup>bright</sup> precursors to adaptive NKG2C<sup>+</sup>  
23 CD56<sup>dim</sup> NK cells. RNA velocity analysis identified a clear directionality in the transition from  
24 CD56<sup>bright</sup> to CD56<sup>dim</sup> NK cells, which was dominated by genes involved in transcription and  
25 translation as well as acquisition of NK cell effector function. Gene expression trends mapped to  
26 pseudotime, defined by increasing entropy, identified three distinct transcriptional checkpoints,  
27 reflecting important changes in regulatory gene-circuits. The CD56<sup>bright</sup> NK cell population  
28 dominated pseudotime with two distinct checkpoints separating precursors from intermediate states  
29 that gradually took on transcriptional signatures similar to CD56<sup>dim</sup> NK cells. The final checkpoint  
30 occurred during late terminal differentiation of CD56<sup>dim</sup> NK cells and was associated with unique  
31 divergent gene-expression trends. Furthermore, we utilized this single-cell RNA sequencing  
32 resource to decipher the regulation of genes involved in lysosomal biogenesis and found a  
33 coordinated gradual increase in the *RAB4* and *BLOC1S* gene families with differentiation into  
34 CD56<sup>dim</sup> NK cells. These results identify important gene programs driving functional  
35 diversification and specialization during NK cell differentiation and hold potential to guide new  
36 strategies for NK cell-based cancer immunotherapy.

## 37 **Introduction**

38 Natural killer (NK) cells are innate lymphocytes that play a vital role in the immune response  
39 through their ability to directly kill transformed and virus infected cells, and by orchestrating the  
40 early phase of the adaptive immune response<sup>1</sup>. NK cells are commonly divided into two distinct  
41 subsets based on their level of CD56 expression, eg. CD56<sup>bright</sup> and CD56<sup>dim</sup> NK cells, with distinct  
42 functional properties. CD56<sup>bright</sup> NK cells, exhibiting an immunoregulatory role, are highly  
43 responsive to cytokine stimulation, primarily located within secondary lymphoid organs and have  
44 poor cytotoxic potential<sup>2-4</sup>. General consensus based on phenotypic profiling and functional and  
45 transcriptional studies identifies this NK cell population as an immature precursor to CD56<sup>dim</sup> NK  
46 cells<sup>5-9</sup>. CD56<sup>dim</sup> NK cells, making up ~90% of all circulating NK cells, express CD16 and exhibit  
47 higher cytotoxic potential coordinated through receptor-mediated input<sup>2,10</sup>. However, this is an  
48 oversimplified view of the NK cell repertoire. Mass cytometry profiling of NK cell repertoires at  
49 the single cell level has revealed an extensive phenotypic diversity comprising up to 100,000  
50 unique subsets in healthy individuals<sup>11</sup>. Much of this diversity is based on combinatorial expression  
51 of stochastically expressed germline encoded activating and inhibitory receptors that bind to MHC  
52 and tune NK cell function in a process termed NK cell education<sup>10,12</sup>. Another layer of diversity  
53 reflects the continuous differentiation through several well-defined intermediate phenotypes<sup>13</sup> from  
54 the naïve CD56<sup>bright</sup> NK cells to the terminally differentiated, adaptive NKG2C<sup>+</sup>CD57<sup>+</sup>CD56<sup>dim</sup>  
55 NK cells, associated with past infection by cytomegalovirus (CMV)<sup>14</sup>. Given the increasing interest  
56 to harness the cytolytic potential of NK cells in cell therapy against cancer, it is of fundamental  
57 importance to understand the molecular programs and regulatory gene circuits that drive NK cell  
58 differentiation and underlie the functional diversification of the human NK cell repertoire.

59         Mouse studies identified important roles for T-bet and Eomes in the differentiation from  
60 immature CD27<sup>+</sup>CD11b<sup>-</sup> to mature CD27<sup>-</sup>CD11b<sup>+</sup> NK cells, but did not delineate the exact

61 intracellular signaling pathways mediating these effects<sup>15,16</sup>. In an attempt to characterize NK cell  
62 heterogeneity within peripheral blood and organs using single-cell RNA sequencing (scRNA-seq),  
63 Crinier et al., identified organ-specific signatures with four populations of human spleen NK cells  
64 with gene signatures along a continuum confined by the traditional CD56<sup>bright</sup> and CD56<sup>dim</sup> NK cell  
65 subdivision<sup>17</sup>. Remarkably however, only two major transcriptional subsets were found in blood-  
66 derived NK cells in both species. Through the use of bulk RNA and ChIP sequencing in human  
67 NK cells, a TCF1-LEF-MYC axis was identified in CD56<sup>bright</sup> NK cells compared to CD56<sup>dim</sup> NK  
68 cells where PRDM1 played a central role<sup>18</sup>. Furthermore, the CMV-driven adaptive NK cell  
69 responses are associated with epigenetic modifications, ultimately reflected in CD8 T cell like  
70 transcriptional profiles<sup>19-21</sup>. These gene regulatory programs underlying the CD56<sup>bright</sup> versus  
71 CD56<sup>dim</sup> NK cell phenotypic classification, provide a transcriptional basis for diverse functional  
72 roles and localization of these subsets. However, it remains to be resolved how these major NK  
73 cell subsets are related to other phenotypically defined stages of NK cell differentiation.  
74 Phenotypically, NK cells are defined using a limited number of markers, but the true heterogeneity  
75 of this population at the transcriptional level is unknown. Furthermore it remains to be examined  
76 if NK cell differentiation at the transcriptional level is a linear process and if so, what transcriptional  
77 checkpoints this may entail.

78 Here we used scRNA-seq and a combination of new bioinformatics tools to specifically  
79 address the developmental relationship between distinct NK cell subsets and to map the gene  
80 programs associated with transitions through discrete stages of differentiation. By sequencing  
81 equal number of cells derived from five phenotypically well-defined human NK cell subsets, our  
82 data unraveled a tightly coordinated differentiation process passing through a number of  
83 transcriptional checkpoints, associated with unique gene-expression trends and changes in  
84 functional modalities. By gaining a deeper understanding of the relationship between NK cell

85 subsets and changes in genetic programs as cells transition through phases of NK cell education it  
86 may be possible to develop new strategies to guide NK cell differentiation towards a desired  
87 functional phenotype for cell therapy.

88

## 89 **Results**

### 90 *NK cell differentiation defined through single cell RNA-seq*

91 To delineate the transcriptional landscape of human NK cell differentiation, we first performed  
92 conventional bulk RNA sequencing of four sorted subsets representing distinct stages of NK cell  
93 differentiation. PCA analysis identified a clear separation between CD56<sup>bright</sup>, conventional and  
94 adaptive CD56<sup>dim</sup> NK cells, whereas the two conventional CD56<sup>dim</sup> subsets (NKG2A<sup>+</sup>KIR<sup>-</sup> and  
95 NKG2A<sup>-</sup>KIR<sup>+</sup>) were closer together in transcriptional space (**Figure 1A**). The four subsets were  
96 ordered counter-clockwise in accordance with a model of NK cell differentiation laid out based on  
97 proliferative responses to cytokines, which postulated that CD56<sup>bright</sup> differentiate into  
98 NKG2A<sup>+</sup>KIR<sup>-</sup>CD56<sup>dim</sup>, NKG2A<sup>-</sup>KIR<sup>+</sup>CD56<sup>dim</sup> and finally to the most mature NKG2A<sup>-</sup>  
99 KIR<sup>+</sup>NKG2C<sup>+</sup>CD56<sup>dim</sup> NK cells (the latter also termed adaptive). In order to address directionality  
100 in this differentiation process and resolve the transition between these phenotypically defined cell  
101 states, we performed single-cell RNA-sequencing (scRNA-seq) on bulk NK cells and five sorted  
102 NK cell subsets, ranging from CD56<sup>bright</sup> NK cells to distinct subsets of CD56<sup>dim</sup> NK cells,  
103 including CD57<sup>+</sup>NKG2C<sup>+</sup> adaptive NK cells (**Supplemental Figure 1A, 2, 3**). In total, 26,506  
104 cells were sequenced. Single cell transcriptional data from an equal number of sequenced cells  
105 from each sample was pooled and merged in one single donor-specific t-SNE plot to examine the  
106 relationship between phenotypically defined NK cell subsets across distinct stages of  
107 differentiation (**Supplemental Figure 1B**). Because of the sorting strategy we were able to study  
108 the rare CD56<sup>bright</sup> NK cells and their relationship to CD56<sup>dim</sup> NK cells in greater detail.  
109 Importantly, despite the use of a limited set of markers to define the five sorted subsets, they  
110 provided a complete representation of the total bulk NK cell signature as no bulk-specific cell  
111 cluster was identified (**Supplemental Figure 1B**).

112 t-SNE analysis revealed two transcriptionally unique islands connected through a narrow  
113 bridge region (**Figure 1B, Supplemental Figure 4A**). Although the sorted NK cell subsets could  
114 be ordered from left to right along the previously defined maturation scheme<sup>22</sup>, their transcriptomes  
115 were highly overlapping with exception of the most naïve CD56<sup>bright</sup> and most mature adaptive  
116 CD56<sup>dim</sup> NK cell subsets. Unbiased clustering by PhenoGraph revealed two clusters in the  
117 CD56<sup>bright</sup> NK cell subset and two clusters in the conventional CD56<sup>dim</sup> NK cell subset (**Figure 1B,**  
118 **Supplemental Figure 4A**). In the first donor, adaptive NK cells represented a fifth cluster as  
119 defined by PhenoGraph that was not found in donor 2, lacking the adaptive NK cell subset.  
120 Validation of the PhenoGraph algorithm using k-means clustering yielded similar results  
121 (**Supplemental Figure 1C**). In agreement with previous data in bulk RNA-seq<sup>23</sup>, NK cells  
122 expressing self and non-self KIR exhibited a high degree of transcriptional overlap and together  
123 made up a significant portion of cluster 3 and 4 (**Supplemental Figure 1D**). Sorted  
124 NKG2A<sup>+</sup>CD56<sup>dim</sup> NK cells exhibited high transcriptional variation and could be identified in all  
125 PhenoGraph-defined clusters (**Supplemental Figure 1D**). Representation of the expression of  
126 canonical differentiation markers, including *NCAM* (CD56), *KLRC2* (NKG2C), *SELL* (CD62L),  
127 *CD7* and *FCGR3A* (CD16) across the t-SNE map corroborated the gradual transitioning from naïve  
128 to more mature NK cells with progression from cluster 1 through 5 (**Figure 1C**).

129 To identify the gene signatures defining the five transcriptional clusters, we performed  
130 differential gene expression analysis between clusters defining unique steps of NK cell  
131 differentiation (**Figure 1D-E**). The most distal CD56<sup>bright</sup> cell population, confined within cluster  
132 1 were more transcriptionally diverse compared to cluster 2 cells and significantly increased genes  
133 in cluster 1 included *IFNG*, *OAS1*, *FGR*, *CDK6*, *CCR5* and *SLC37A1*. Visual representation of key  
134 regulatory genes also revealed high expression of *IL2RB*, *IL2RG* and *IL15RA* as well as *KLRD1*,  
135 *RUNX3* and *IKZF2* in cluster 1 (**Figure 1F**). The biggest transcriptional difference was observed

136 between cluster 2 and 3, largely representing the CD56<sup>bright</sup> to CD56<sup>dim</sup> transition, with CD56<sup>dim</sup>  
137 NK cells being more transcriptionally diverse (**Figure 1D-E**). Genes with significantly increased  
138 expression in cluster 2 included *XCL1*, *SELL*, *CCR1*, *LEF1*, *IL7R*, *GZMK*, *LTB*, *CD27*, *CCR7*,  
139 *MYC*, *CAPG*, *KIT*, *IL23A* and *BACH2*. Conversely, cluster 3 was defined through higher expression  
140 of *CCL3*, *CCL4*, *CCL5*, *RORA*, *GZMA*, *GZMB*, *GZMH*, *GZMM*, *FCGR3A*, *TIGIT*, *NFKBIA*,  
141 *CX3CR1*, *PRDM1*, *ZEB2*, *TFEB* and *MICB*. Cluster 3 and 4, containing a mixture of conventional,  
142 phenotypically defined, CD56<sup>dim</sup> NK cell subsets, exhibited the fewest transcriptional differences  
143 (**Figure 1D-E**) with *CD38*, *LAIR2*, *GNAQ*, *RETSAT*, *CCDC41*, *BTRC* and *NARS2* being  
144 upregulated in cluster 3 and only *ALKBH2* in cluster 4. Overall, cluster 3 appears to represent a  
145 slightly more activated cell state within the conventional CD56<sup>dim</sup> NK cell compartment with  
146 higher expression of cytokine receptors, *CD38*, *SIGLEC7*, *KLRB1*, and *TBX21*, rather than being  
147 a unique differentiation stage (**Figure 1F**). The comparison between cluster 4 and 5 is  
148 representative of the transition from conventional to adaptive NK cells and was characterized by a  
149 general loss of gene expression (**Figure 1D-E**), in line with the previously reported epigenetic  
150 reprogramming during terminal NK cell differentiation<sup>18,19</sup>.

151 Thus, analysis of scRNA-seq data from sorted NK cell subsets identified unique  
152 transcriptional clusters, which only partially overlapped with phenotypic subsets. Notably, we  
153 identified two transcriptionally-defined differentiation stages within the CD56<sup>bright</sup> population and  
154 a unique cluster within the conventional CD56<sup>dim</sup> population with a gene expression profile  
155 suggestive of an activated cell state.

156  
157 *Continuous and coordinated transcriptional changes in pseudotime*  
158 Bulk RNA-seq of the two main NK cell populations has identified unique and evolutionary  
159 conserved regulatory programs driven by TCF1-MYC (CD56<sup>bright</sup>) and PRDM1-ZEB2-MAF



160 (CD56<sup>dim</sup>)<sup>18</sup>. Plotting these regulatory genes on the transcriptional map, generated by merging  
161 single-cell transcriptional signatures of distinct NK cell subsets, suggested that the TCF-MYC axis  
162 is gradually replaced by the PRDM1-ZEB2-MAF-driven effector program (**Figure 2A**). Hence, we  
163 hypothesised that these genes may be used to probe directionality and temporal relationships in the  
164 differentiation process. Although sequencing of single cells only provides a snapshot in time, the  
165 ratio of spliced to unspliced mRNA content within individual cells provides the necessary data to  
166 calculate RNA velocity<sup>24</sup>. RNA velocity is a vector based on the time derivative of gene expression,  
167 which can predict the future state of the cell (in the range of hours) in terms of gene expression.  
168 Our dataset exhibited minimal differences in spliced and unspliced mRNA, with the exception of  
169 within the CD56<sup>bright</sup> island (**Figure 2B, Supplemental Figure 4B**). Vector length, indicating the  
170 speed at which the cells are changing gene expression, increased with proximity to the bridge  
171 region linking the two transcriptional islands. Importantly, the directionality of the vector indicated  
172 a transition from the CD56<sup>bright</sup> to the CD56<sup>dim</sup> transcriptional island. Genes that contributed highly  
173 to the RNA velocity vector, in terms of spliced versus unspliced mRNA, included genes associated  
174 with transcription and translation (*MBNL1*, *TNRC6B*, *PARP8*, *FOXPI*, *NR3C1*), the actin  
175 cytoskeleton (*ARHGAP15*, *UTRN*, *TXK*), intracellular signaling (*PRS3*, *TNIK*), and NK cell  
176 functionality (*AOAH*, *CBLB*, *SKAP1*, *CD96*, *IL12RB2*, *CLEC2D*, *FYN*, *LYST*) (**Supplemental**  
177 **Table 1**).

178 Careful scrutiny of the subset origin of cells localized on both sides of the bridge suggests  
179 a non-dramatic transition from CD56<sup>bright</sup> to CD56<sup>dim</sup> NK cells. A significant fraction of sorted  
180 NKG2A<sup>+</sup>CD56<sup>dim</sup> NK cells were identified within the smaller predominantly CD56<sup>bright</sup> island  
181 (**Figure 1A, Supplemental Figure 4A**). To further characterize the cells defining the bridge  
182 region, we identified custom clusters (pre, post) consisting of the 100 most proximal cells on each  
183 side of the bridge (**Figure 2C**). Despite 40% of the pre-cluster consisting of sorted CD56<sup>bright</sup> NK

184 cells, the cluster also contained 50% sorted NKG2A<sup>+</sup>CD56<sup>dim</sup> NK cells and even a small population  
185 of KIR<sup>+</sup> CD56<sup>dim</sup> NK cells (**Figure 2D**), suggesting that changes in these commonly used  
186 phenotypic markers may be partly dissociated from underlying global transcriptional changes.

187 Thus, NK cell differentiation from CD56<sup>bright</sup> to CD56<sup>dim</sup> is associated with coordinated and  
188 yet gradual changes in phenotypic surface markers that are tightly linked to reciprocal regulatory  
189 gene circuits controlled by NK cell-specific transcription factors.

190

### 191 *Transcriptional checkpoints and gene-expression trends during early NK cell differentiation*

192 To establish a transcriptional timeline of NK cell differentiation, we implemented pseudotime  
193 (Palantir) analysis, providing an unbiased approach to model trajectories of differentiating cells<sup>25</sup>.

194 Palantir treats cell-fate as a probabilistic process and uses entropy to measure the changing nature  
195 of cells along the differentiation trajectory. The starting cell (highest MYC expression) was chosen  
196 based on the CD56<sup>bright</sup> regulome (**Figure 2A, 3A, Supplemental Figure 4C**) identified by Collins  
197 et al<sup>18</sup>. Pseudotime analysis using BACH2 or LEF1 to define the starting cell yielded similar results.  
198 The Palantir algorithm identified one terminal cell, located at the tip of cluster 5 furthest from the  
199 bridge, belonging to the adaptive population (**Figure 3A**). In the conventional donor, the terminal  
200 cell was identified within cluster 4, belonging to the mature population (**Supplemental Figure**  
201 **4C**).

202 Plotting the transcriptional signatures of the sorted samples against pseudotime revealed  
203 that 75% of pseudotime, reflecting gene diversity and decreasing entropy, was occurring within the  
204 CD56<sup>bright</sup> NK cell differentiation stage (**Figure 3B**). Distribution within the CD56<sup>bright</sup> sorted cells  
205 was centered around 65% of pseudotime, with the first 60% of pseudotime corresponding to the  
206 smaller population of sorted cells grouping as cluster 1 cells (**Figure 3B**). This further corroborate  
207 the notion that the immature CD56<sup>bright</sup> cells can be separated into two transcriptionally distinct

208 subsets occupying distinct stages of the differentiation timeline (**Figure 1A**). Individual stages of  
209 CD56<sup>dim</sup> differentiation were largely assigned to the final 20% of pseudotime with outliers in the  
210 NKG2A<sup>+</sup>CD56<sup>dim</sup> NK cells being part of the earlier phase in pseudotime (**Figure 3B**). NK cells  
211 expressing self and non-self KIR occupied the same location within pseudotime whereas adaptive  
212 NK cells were confined to the last 10% of pseudotime (**Figure 3B**).

213 Having established a timeline for differentiation through the use of pseudotime,  
214 generalized-additive models (GAMs) were fitted on cells ordered by pseudotime to identify  
215 common gene expression. Three common global gene trends were identified, containing between  
216 713 to 1181 genes (**Figure 3C**). Distinct checkpoints (blue, green, red line) with low gene  
217 expression diversity were identified in all gene trends at the same timepoints, indicative of  
218 differentiation checkpoints (**Figure 3C**). In addition to low gene expression diversity, these  
219 transcriptional checkpoints identified the timepoints where the gene expression changed  
220 directionality. When mapped back to the t-SNE plot, the checkpoints were located at the tip of the  
221 CD56<sup>bright</sup> island (blue), prior to the transition between cluster 1 and 2 (green) and at the transition  
222 into the adaptive population (red) (**Figure 3D**). Hence major transcriptional changes are occurring  
223 early after entering the NK cell lineage, during differentiation within the CD56<sup>bright</sup> NK population  
224 and upon transitioning into the adaptive stage. Importantly, the checkpoint within the bright  
225 population already occurs in the latter half of pseudotime, again highlighting that a dominating part  
226 of transcriptional changes occur within the CD56<sup>bright</sup> population (**Figure 3C**).

227 Gene set enrichment analysis (GSEA) was utilized to characterize the main transcriptional  
228 programs associated with each global gene trend (**Figure 3E**). Trend 1 included genes whose  
229 expression negatively correlated with pseudotime and which belonged to processes involved in  
230 mitochondrial translational elongation, regulation of hematopoietic stem cell differentiation, TNF-  
231 mediated signaling, and stimulatory C-type lectin receptor signaling. Genes included in trend 2 are

232 initially stable but steadily increase from the bright checkpoint to the terminal checkpoint.  
233 Transcriptional programs associated with this expression trend included intracellular signal  
234 transduction, TGF $\beta$  receptor signaling, neutrophil degranulation, negative regulation of  
235 transcription (RNA polymerase II) and actin cytoskeleton organization. The final trend, global  
236 trend 3, contained genes whose expression decreased until the bright checkpoint and then remained  
237 relatively stable until the terminal checkpoint. GO terms associated with these genes include  
238 mRNA splicing (via spliceosome), apoptotic process, negative regulation of mitotic cell cycle  
239 phase transition, mitochondrion organization and endomembrane system organization (**Figure 3E**).

240

#### 241 *Diversified gene-expression patterns during terminal NK cell differentiation*

242 As the global pseudotime analysis was dominated by CD56<sup>bright</sup> NK cells we next zoomed in on  
243 the later time-points (> 80% of pseudotime), where higher standard deviation highlighted a poorer  
244 fit of the identified global gene trends (**Figure 3C**). Hence, transcriptional programs within the  
245 CD56<sup>dim</sup> population were to a certain degree uncoupled from transcriptional programs defining NK  
246 cell differentiation within the CD56<sup>bright</sup> stage. To dissect which transcriptional programs accounted  
247 for this variation observed in the gene trends, we performed new clustering only taking pseudotime  
248 > 80% into account (**Figure 4A**). Three new CD56<sup>dim</sup> trends (dim trends) were identified,  
249 consisting of two down-trending and one up-trending trend, in line with the general decrease in  
250 gene expression observed in the transition from conventional CD56<sup>dim</sup> to adaptive cells<sup>19–21</sup>.

251 Dim trend 1, the largest trend in terms of gene number (2575 genes), contained genes that  
252 steadily decreased within the later stages of pseudotime. Gene ontology terms associated with these  
253 genes include mitochondrial translation elongation, apoptotic process, positive regulation of  
254 telomere maintenance via telomerase, mitotic cell cycle process and regulation of hematopoietic

255 stem cell differentiation (**Figure 4B**). Although initially decreasing, genes included in dim trend 2  
256 were maintained at low expression from 90% of pseudotime onwards and associated with cellular  
257 response to cytokine stimulus, positive regulation of leukocyte cell-cell adhesion, cell chemotaxis,  
258 positive regulation of metabolic process and regulation of leukocyte differentiation. Lastly, dim  
259 trend 3 contained genes which steadily increased in the final stages of pseudotime, representing a  
260 clear minority. Gene ontology terms associated with these genes include leukocyte activation,  
261 negative regulation of cellular process and regulation of intracellular signal transduction.

262 We recently identified a role for lysosomal remodelling in the functional tuning of human  
263 NK cells during education<sup>23</sup>. Self-KIR<sup>+</sup> NK cells show a non-transcriptional accumulation of  
264 granzyme B stored in large dense-core secretory lysosomes, which are released upon target cell  
265 recognition<sup>23</sup>. However, such dynamic changes to the lysosomal compartment with consequences  
266 on the ability to store granzyme B and perforin, requires a continuous and transcriptionally-  
267 regulated biogenesis of lysosomes and effector molecules as well as tight coordination of genes  
268 involved in synapse formation and degranulation. Indeed, whereas the dominating gene expression  
269 trends within the CD56<sup>dim</sup> stages of differentiation (> 80% of pseudotime) show a gradual decrease  
270 in gene expression, genes involved in lysosomal biogenesis and effector function largely followed  
271 dim trend 3, which increases with differentiation and thereby provide a template for further  
272 functional tuning during NK cell education. We performed factor analysis on genes involved in  
273 lysosomal biogenesis and projected these onto the temporal transcriptional map of human NK cell  
274 differentiation (**Figure 4C**). Factor analysis revealed lowest expression in cluster 1, whereas the  
275 CD56<sup>dim</sup> clusters (cluster 3-5) exhibited the highest expression. Next, we zoomed in on individual  
276 genes contained within the factor analysis which are important vesicular components and involved  
277 in their regulation and biogenesis (BLOC complex) (**Figure 4D**). The IL-15 inducible genes *PRF1*  
278 (perforin), *GZMA* (granzyme A), and *GZMB* (granzyme B) were highly expressed in cluster 3, in

279 line with higher *IL15RA* and *IL2RG* expression in this cluster (**Figure 1E**). *GZMA*, *GZMB* and  
280 *GZMH* (granzyme H) were also highly expressed within cluster 5. *SRGN* (serglycin) and *GZMK*  
281 (granzyme K) exhibited a reverse gene expression pattern, being highly expressed within cluster 1  
282 and 2. The Rab proteins (*RAB4A*, *RAB4B*, *RAB27A*) play a role in vesicular and protein trafficking  
283 as well as granule exocytosis, maturation and docking at the immune synapse. These genes  
284 exhibited higher expression within the CD56<sup>dim</sup> island, with some outliers within cluster 1 also  
285 exhibiting higher expression. *VAMP7* and *STX7* are important for cytotoxic granule exocytosis in  
286 NK cells and were highly expressed within cluster 1 and 3, again in line with increased IL-15  
287 signaling in these cells. Lysosomal exocytosis is regulated through calcium signaling and at the  
288 transcriptional level by *TFEB*, which is further regulated through phosphorylation<sup>26</sup>. *TFEB*  
289 expression greatly increased after transitioning into the CD56<sup>dim</sup> island, with highest expression  
290 found in cluster 3. Lastly, the BLOC complex, consisting of *BLOC1S1*, *BLOC1S2* and *BLOC1S3*,  
291 was also higher expressed within the CD56<sup>dim</sup> island. This complex is important for normal  
292 biogenesis of lysosome-related organelles, such as granules and for their intracellular trafficking.  
293

## 294 Discussion

295 We report a compact description of the transcriptional diversification at the single cell level during  
296 human NK cell differentiation. By enriching for less frequent, but phenotypically well-defined NK  
297 cell subsets, we could elucidate key regulatory gene programs within both the CD56<sup>bright</sup> and the  
298 CD56<sup>dim</sup> subset, as well as the developmental relationship of intermediate cell states. Pseudotime  
299 analysis highlighted the dominant role CD56<sup>bright</sup> NK cells play during NK cell differentiation, with  
300 two out of three transcriptional checkpoints occurring within this small population of cells. In line  
301 with previous reports on CMV-driven epigenetic reprogramming of terminally differentiated  
302 adaptive NK cells<sup>19-21</sup>, the transition to this stage represented a major transcriptional checkpoint  
303 during NK cell differentiation.

304 The view that NK cells, like T cells, undergo a continuous process of NK cell differentiation  
305 is recent and mostly based on phenotypic and functional classification of discrete subsets<sup>5</sup>. Most  
306 evidence suggest that the CD56<sup>bright</sup> NK cell subset is the most naïve and gives rise to the more  
307 mature CD56<sup>dim</sup> NK cells which may then undergo further differentiation towards more terminal  
308 stages, a process that is accelerated by CMV infection<sup>27</sup>. Numerous studies have been performed  
309 in mice lacking NK specific transcription factors, using lineage tracing in macaques and in humans  
310 with immunodeficiencies, but the transcriptional identities and relationships between the manifold  
311 of putative intermediate cell states of NK cell differentiation remains elusive<sup>5-9</sup>.

312 The CD56<sup>bright</sup> NK cell subset has a unique functional phenotype and tissue localization.  
313 Although infrequent in peripheral blood, they make up the large majority of NK cells within  
314 secondary lymphoid organs<sup>4</sup>. In line with previous reports, t-SNE analysis of a comprehensive  
315 scRNA-seq dataset from multiple sorted NK cell subsets identified two main transcriptional islands  
316 of NK cells<sup>17</sup>. Whereas all CD56<sup>bright</sup> NK cells were confined to the smaller island, a small but  
317 definite collection of sorted CD56<sup>dim</sup> NK cells, primarily NKG2A<sup>+</sup>KIR<sup>-</sup>CD57<sup>-</sup>, grouped

318 transcriptionally within the CD56<sup>bright</sup> population. While we cannot rule out the possibility of small  
319 numbers of CD56<sup>bright</sup> NK cells contaminating our sorted population, their low frequency within  
320 the total NK cell population cannot account for the near 20% of CD56<sup>dim</sup> NK cells observed within  
321 cluster 2. We have previously observed transcriptional reprogramming of educated NK cells to a  
322 more immature transcriptional signature in response to IL-15 induced proliferation which also  
323 correlated with NKG2A expression<sup>28</sup>. Hence, NKG2A<sup>+</sup>CD56<sup>dim</sup> NK cells exhibiting a CD56<sup>bright</sup>  
324 transcriptional signature could represent cells having undergone transcriptional reprogramming.  
325 Alternatively, these cells could represent CD56<sup>bright</sup> NK cells that have downregulated CD56  
326 expression at the surface level prior to further transcriptional changes occurring. CD56 is an  
327 adhesion molecule and has been associated with formation of a developmental synapse and distinct  
328 migratory behavior depending on the density of CD56 on the cell's surface<sup>29</sup>. Hence,  
329 downregulation of CD56 surface expression could result in altered receptor input as a result of  
330 synapse formation, ultimately leading to the acquisition of a CD56<sup>dim</sup> transcriptional signature.  
331 Although the bridge between transcriptional islands marked a clear decrease in *NCAMI* (CD56)  
332 expression, a gradual decrease was already observed prior to the bridge occurring within the late  
333 CD56<sup>bright</sup> NK cell population. *FCERG3A* (CD16) is normally expressed on CD56<sup>dim</sup> cells but can  
334 also be used to define a population of functional intermediate CD56<sup>bright</sup> cells<sup>30</sup>. Although CD16  
335 was not included in the sorting panel, *FCERG3A* is only significantly differentially expressed  
336 between cluster 2 and 3, despite a moderate decrease from cluster 1 to 2. Hence this functionally  
337 intermediate CD16<sup>+</sup>CD56<sup>bright</sup> NK cell population may contribute but does not solely define the  
338 two CD56<sup>bright</sup> clusters identified here.

339 RNA velocity, a recently described approach to predict future cell states<sup>24</sup>, confirmed a  
340 transcriptional transition from CD56<sup>bright</sup> into CD56<sup>dim</sup> NK cells occurring via transition over the  
341 bridge separating the two transcriptional islands. Among the top genes contributing to the RNA



342 velocity vector were genes associated with NK cell receptor signaling and functionality (*LYST*,  
343 *CBLB*, *CD96*, *CLEC2D*, *SKAPI*, *FYN*). *LYST* is a regulator of lysosomal trafficking, and mutations  
344 in this gene leads to a lysosomal storage disorder, Chediak-Higashi syndrome, characterized by  
345 defects in NK cell degranulation leading to the accumulation of large granules within these  
346 patients<sup>31,32</sup>. *CBLB*, has been linked to inhibitory NK cell signaling through its modulation of LAT,  
347 a substrate of tyrosine phosphatase SHP-1<sup>33</sup>. Hence, Cbl ubiquitin ligase encoded for by *CBLB* is  
348 important for mediating inhibitory receptor input which is essential for NK cell functionality.  
349 Another inhibitory receptor on NK cells is CD96, which along with TIGIT and DNAM-1 can bind  
350 PVR (CD155). CD96 is expressed at the protein level upon NK cell activation<sup>34</sup> and competes with  
351 DNAM-1 (CD226) for binding to their common ligand, with CD96 exhibiting an inhibitory  
352 function leading to decreased cytokine release<sup>35</sup>. LLT1 (*CLEC2D*) is a C-type lectin that functions  
353 as the ligand for CD161 (*KLRBI*). CD161 expression on NK cells has been linked to cytokine-  
354 responsiveness and blocking of LLT1 enhanced cytotoxicity against breast cancer cells<sup>36,37</sup>. In T  
355 cells, the adaptor protein SKAP-55 (*SKAPI*) links the T cell receptor to signaling via LFA-1 which  
356 is also expressed on NK cells. Furthermore, *SKAPI* can also form homodimers and could play a  
357 similar role in NK cells, where LFA-1 signaling has been linked to education<sup>38,39</sup>. Lastly, *FYN* is a  
358 Src kinase involved in signaling through PI3K and ERK1/2, leading to increased cytotoxicity via  
359 polarization of perforin in NK cells<sup>40</sup>. Transitioning across the bridge region was a gradual  
360 transition phenotypically, with defining transcriptional changes, as identified by RNA velocity  
361 occurring just prior to this region. In particular, these transcriptional changes occurred in genes  
362 having major functional implications for NK cell cytotoxicity.

363 A surprising finding was the dominance of the CD56<sup>bright</sup> population in pseudotime and the  
364 two transcriptionally unique clusters. The first 60% of pseudotime consisted of cluster 1 cells and  
365 two of the three major transcriptional changes (checkpoints) occurred within this population and

366 as it transitioned into cluster 2 cells. This highlights the transcriptional diversity within the  
367 CD56<sup>bright</sup> population and identifies the group of cells at the beginning of pseudotime as  
368 transcriptionally unique. This small population was characterized by high *KLRB1* (CD161) *KLRD1*  
369 (CD94), *NCAMI* (CD56), *CD7*, *IL15RA* (CD215), *IL2RB* (CD122), *IL2RG* (CD132), *RUNX3* and  
370 *IKZF2* (Ikaros) expression. *IKZF2* has been shown to be important for NK cell precursors within  
371 the liver<sup>41</sup>. Rather surprising, cells in cluster 1 at the beginning of pseudotime exhibited relatively  
372 high levels of *GZMB* comparable to those in CD56<sup>dim</sup> NK cells. In mice, Granzyme B mRNA is  
373 abundant in NK cells, but only translated upon cytokine stimulation<sup>42</sup>. In humans, CD56<sup>dim</sup> NK  
374 cells express high amounts of Granzyme B compared to CD56<sup>bright</sup> cells, but both can increase their  
375 expression levels in response to cytokine stimulation<sup>43,44</sup>. High *GZMB* expression in this early  
376 CD56<sup>bright</sup> precursor state could be due to high cytokine responsiveness, as these cells also  
377 expressed high amounts of *IL2RB* and *IL2RG*. NK cell development is also dependent on cytokine  
378 priming, whereby *IL2RB* and *IL15RA* knockout mice were deficient of NK cells<sup>45,46</sup>. To be able to  
379 eliminate false-negatives (drop-outs) in our dataset, a result of technical limitations of scRNA-seq  
380 combined with low RNA content in resting NK cells, we implemented MAGIC to help visualize  
381 gene expression across the t-SNE map. Notably, MAGIC was not used for any other downstream  
382 analysis, effectively avoiding the generation of false positives which can be introduced by such  
383 imputation tools<sup>47</sup>.

384         The second transcriptional checkpoint was less defined in terms of standard deviation but  
385 coincided with a change in gene expression within the trends analyzed. This correlated with  
386 transitioning between cluster 1 and 2 within the CD56<sup>bright</sup> NK cell population and was  
387 characterized by a decrease in *KLRB1* (CD161), *KLRD1* (CD94), *IL15RA* (CD215), *IL2RB*  
388 (CD122), *IL2RG* (CD132), *RUNX3*, *IKZF2* (Ikaros), *MYC* and *LEF1*. The decrease in cytokine  
389 receptors combined with *RUNX3* indicates reduced sensitivity to cytokine signaling, which is

390 further reduced upon the CD56<sup>dim</sup> transition<sup>48</sup>. This is in line with *CISH* (CIS), a negative regulator  
391 of IL-15 signaling, having the lowest expression in cluster 2<sup>49</sup>. Expression of effector molecule  
392 genes, including *PRFI* (perforin), *GZMA* (granzyme A), *GZMB* (granzyme B), *GZMH* (granzyme  
393 H) were also reduced in cluster 2. Overall, transitioning from cluster 1 to 2 was accompanied by a  
394 decrease in transcriptional heterogeneity, resulting in a narrower transcriptional profile in these  
395 later stages CD56<sup>bright</sup> cells.

396 Although the conventional CD56<sup>dim</sup> population exhibits a high degree of heterogeneity,  
397 both phenotypically and functionally, it only consisted of two transcriptionally defined clusters,  
398 clusters 3 and 4. These two clusters had a similar distribution, mainly containing KIR<sup>+</sup> and a small  
399 proportion of NKG2A<sup>+</sup>CD56<sup>dim</sup> NK cells. Both clusters exhibited higher expression of *IKZF3*  
400 (Aiolos) and *TBX21* (T-bet) compared to CD56<sup>bright</sup> clusters, important transcription factors for  
401 maturation of NK cells in the periphery<sup>15,50,51</sup>. When compared to cluster 4, cluster 3 exhibited  
402 increased gene expression which was indicative of an activated genotype, characterized by high  
403 *SIGLEC7*, *CD38*, *IL15RA* (CD215), *IL2RB* (CD122) and *PRFI* (Perforin) expression, rather than  
404 a separate stage of differentiation<sup>52</sup>. NK cells express IL-15RA at detectable levels on the surface  
405 after IL-15 stimulation<sup>53</sup>. Similarly, CD38 and Perforin are both upregulated upon IL-15  
406 stimulation. Cluster 3 cells therefore appears to represent activated cells, which are responsive to  
407 cytokine stimulation, in line with them occupying a slightly earlier pseudotime compared to cluster  
408 4. In agreement with bulk RNA-seq in both mouse and human NK cells<sup>23,54</sup>, we observed no unique  
409 transcriptional signatures between self KIR (educated) and non-self KIR (uneducated) NK cells  
410 and both sorted populations occupied the same space in pseudotime<sup>23</sup>. Remodelling of the  
411 lysosomal compartment has been shown to be important for the increased functionality observed  
412 in educated NK cells<sup>23</sup>. Here, we observed an increase in lysosomal biogenesis in the later stages  
413 of pseudotime, in line with increased functionality within the CD56<sup>dim</sup> NK cells. Thus, NK cell

414 differentiation establishes a functional template through a tightly controlled and transcriptionally  
415 regulated increase in the expression of genes involved in lysosomal biogenesis and exocytosis  
416 alongside increased expression of effector molecules such as granzyme B and perforin. Acquisition  
417 of self or non-self KIRs during later stages of differentiation sets the cells on different functional  
418 trajectories during education, which involves a non-transcriptional remodelling of the lysosomal  
419 compartment that ultimately changes the cytotoxic payload of the cell<sup>23</sup>.

420         Adaptive NK cells clustered independently and uniquely identified within the last 10% of  
421 pseudotime. Transitioning into cluster 5 was accompanied by the third and final checkpoint,  
422 highlighting the important transcriptional changes occurring at this stage of differentiation.  
423 Compared to conventional CD56<sup>dim</sup> NK cells, the global transcriptome of adaptive NK cells was  
424 highly reduced. This is in line with epigenetic silencing that has been described for this population  
425 of terminally mature NK cells<sup>19–21</sup>. Gene expression of *SYK*, *CD38* and *KLRB1* (CD161) was  
426 reduced while *ZEB2*, *KLF2*, *PRDMI* (BLIMP-1), *KLRC2* (NKG2C), *GZMH* (Granzyme H) were  
427 highly expressed.

428         Here we have applied new bioinformatic tools to a unique single-cell RNA sequencing  
429 dataset in order to identify a temporal transcriptional map of human NK cell differentiation.  
430 Mapping gene expression trends to pseudotime allowed for the identification of distinct  
431 transcriptional checkpoints highlighting important transcriptional changes during NK cell  
432 differentiation. Two previously undescribed transcriptional populations within the CD56<sup>bright</sup>  
433 subset were identified and dominated the differentiation timeline. This dataset provides a valuable  
434 tool to identify important gene programs that drive functional diversification and specialisation  
435 during NK cell differentiation. Such knowledge hold potential to guide the development of new  
436 strategies for NK cell-based cancer immunotherapy.

## 437 **Materials & Methods**

### 438 *Cell processing*

439 Peripheral mononuclear cells (PBMC) were isolated using density gradient centrifugation from  
440 anonymized healthy blood donors (Oslo University Hospital) with informed consent as approved  
441 by the regional ethics committee in Norway (scRNA-seq) and Sweden (bulk RNA-seq)  
442 (2015/2095, 2016/1415-32, 2018/2485). Donor-derived PBMCs were screened for KIR education  
443 and adaptive status using flow cytometry. NK cells were purified using an AutoMACS (DepleteS  
444 program, Miltenyi Biotec) and prior to overnight resting in complete RPMI (10% Fetal calf serum,  
445 2mM L-glutamine) at 37°C/5% CO<sub>2</sub>.

446

### 447 *Flow cytometry screening*

448 PBMC were stained for surface antigens and viability in a 96 V-bottom plate, followed by  
449 fixation/permeabilization and intracellular staining at 4°C. The following antibodies were used in  
450 the screening panel: CD3-V500 (UCHT1), CD14-V500 (MφP9), CD19-V500 (HIB19), Granzyme  
451 B-AF700 (GB11) from Beckton Dickinson; CD57-FITC (HNK-1), CD38-BV650 (HB-7),  
452 KIR3DL1-BV421 (DX9) from BioLegend; KIR2DL1-APC-Cy7 (REA284), CD158a,h-PE-Cy7  
453 (11PB6), from Miltenyi Biotec; CD158b1/b2,j-PE-Cy5.5 (GL183), NKG2A-APC (Z199), CD56-  
454 ECD (N901) from Beckman Coulter. LIVE/DEAD Fixable Aqua Dead Stain kit for 405 nM  
455 excitation (Life Technologies) was used to determine viability. Samples were acquired on an LSR-  
456 Fortessa equipped with a blue, red and violet laser and analyzed in FlowJo version 9 (TreeStar,  
457 Inc.).

458

459 *FACS sorting*

460 Cells were harvested and surface stained with the following antibodies: CD57-FITC (HNK-1) from  
461 BioLegend; KIR3DL1S1-APC (Z27.3.7), CD56-ECD (N901), CD158b1/b2,j-PE-Cy5.5 (GL183),  
462 from Beckman Coulter; KIR2DL1-APC-Cy7 (REA284), NKG2C-PE (REA205), NKG2A-PE  
463 Vio770 (REA110) from Miltenyi Biotec. 12,000 cells were directly sorted into Eppendorf tubes at  
464 4°C for each sample (**Supplemental Figure 1A**) using a FACSAriaII (Beckton Dickinson).

465

466 *Bulk RNA sequencing*

467 Four populations (CD56<sup>bright</sup>, NKG2A<sup>-</sup>KIR<sup>-</sup>CD56<sup>dim</sup>, NKG2A<sup>-</sup>KIR<sup>+</sup>CD56<sup>dim</sup>, and NKG2A<sup>-</sup>  
468 KIR<sup>+</sup>NKG2C<sup>+</sup>CD56<sup>dim</sup>) were sorted from six individual healthy blood donors. Sequencing was  
469 performed using single-cell tagged reverse transcription (STRT)<sup>55</sup>. Principle component analysis  
470 (PCA) was used to generate a biplot of the four sequenced subsets.

471

472 *Single-cell RNA sequencing*

473 Following sorting, cells were kept on ice during the washing (PBS + 0.05% BSA) and counting  
474 step. 10,000 cells were resuspended in 35 µL (PBS + 0.05% BSA) and immediately processed at  
475 the Genomics Core Facility (Oslo University Hospital) using the Chromium Single Cell 3' Library  
476 & Gel Bead Kit v2 (Chromium Controller System, 10X Genomics). The recommended 10x  
477 Genomics protocol was used to generate the sequencing libraries, which was performed on a  
478 NextSeq500 (Illumina) with 5~ % PhiX as spike-in. Sequencing raw data were converted into  
479 fastq files by running the Illumina's bcl2fastq v2.

480

481 *Quality control and normalization of scRNA-seq data*

482 Data cleaning steps were first carried out whereby cells not expressing a minimum of 1000  
483 molecules and genes expressed by less than 10 cells were filtered out. The data was normalized  
484 using log transformation based on the total expression of the gene in the sample, the default  
485 normalization method implemented in the Palantir library. Feature selection was carried out to  
486 select high cell-to-cell variance, implementing a cutoff of log<sub>2</sub>-fold change > 2, whereby only  
487 significantly differentially expressed genes were selected.

488

489 *Dimensionality reduction of scRNA-seq data*

490 A number of dimensionality reduction methods were implemented, including principle component  
491 analysis (PCA) for initial noise reduction and non-linear diffusion maps to estimate a lower  
492 dimensional manifold that could be implemented for further downstream analysis. For  
493 visualization purposes, t-SNE and UMAP were utilized<sup>56,57</sup>.

494

495 *Gene expression imputation of scRNA-seq data*

496 Markov affinity-based graph imputation of cells (MAGIC) was utilized to de-noise the data in order  
497 to optimize the gene expression analysis for visualization on the t-SNE maps<sup>58</sup>. The imputed data  
498 matrix was not used for further downstream analysis and was not used for computation of the  
499 differentially expressed genes (DEG).

500

501 *Differentiation trajectories and gene trend analysis of scRNA-seq data*

502 Palantir was used to carry out the trajectory analysis and pseudotime calculations<sup>25</sup>. The starting  
503 cells was identified as having the highest MYC expression, for which the imputed data matrix was  
504 used to eliminate selection of outlier cells. The Palantir algorithm calculates the probability of each  
505 individual cell to end up in each of the inferred terminal states, whereby only one terminal state  
506 was identified in both donors. Generalized-additive models (GAMs) fitted on cells ordered by  
507 pseudotime were used to calculate gene trends, where the contribution of cells was weighted by  
508 their probability to end up in the given terminal state as calculated by Palantir. The gene trends  
509 indicate how gene expression levels develop over the differentiation timeline. Local gene trends  
510 were calculated by zooming in on a particular range of pseudotime ( $> 0.8$ ).

511

#### 512 *Clustering, differential gene expression and gene set enrichment analysis scRNA-seq data*

513 The gene trends were clustered using the PhenoGraph algorithm and confirmed using k-means  
514 clustering, whereby the number of clusters identified by PhenoGraph was utilized as the k input  
515 parameter<sup>59</sup>. For differential gene expression (DEG) analysis, the SCDE package implementing the  
516 Bayesian approach, was utilized<sup>60</sup>. SCDE is optimized to deal with the single cell specific challenge  
517 of dropouts. A log-fold change of  $> 2$  and adjusted p-value  $> 0.05$  were deemed significant. Gene  
518 over-expression analysis (Gene Ontology, PANTHER) was used downstream of the gene trend  
519 clustering and DEG analysis to identify significant differences in biological pathways.

520

#### 521 *RNA velocity of scRNA-seq data*

522 RNA velocity was run directly on the output created by Cell Ranger, containing the count matrix  
523 and the abundance of spliced and unspliced versions of each transcript<sup>24</sup>. Using the velocyto Python



524 library, the velocity vectors and locally average vector fields were calculated, which were the  
525 projected onto the same t-SNE or UMAP embedding that was used for visualizing other analysis.

526

### 527 *Factor analysis of scRNA-seq data*

528 Factor analysis was utilized to obtain a single metric for a set of genes. The gene lists for specific  
529 biological functions were obtained from Gene Ontology terms and the f-scLVM method in the  
530 Python package slalom was then used for the factor analysis<sup>61</sup>.

531

### 532 *Data sharing statement*

533 All sequencing data (bulk and sc) will be deposited at NCBI GEO depository and will be  
534 accessible with an accession number GEO: X or using the link  
535 <https://www.ncbi.nlm.nih.gov/geo/query/X>.

536

### 537 *Authorship and conflict-of-interest*

538 A.P. performed the single-cell RNA sequencing experiments and the bulk RNA sequencing  
539 experiments. S. L. performed the RNA sequencing and library preparation. H.N. and T.C.  
540 performed the bioinformatic analysis. E.H.A. analyzed data. J.P.G and E.S. provided scientific  
541 input. H.N. and T.C. contributed to the writing of the paper. H.N., T.C, A.P and K-J.M. designed  
542 research. A.P. and K-J.M. wrote the manuscript. K-J.M. is a scientific advisor and consultant at  
543 Fate Therapeutics.

544

545 *Code availability*

546 Custom code utilized for analysis is available on the GitHub repository,

547 <https://github.com/hernet/SingleFlow>.

548 **References**

- 549
- 550 1. Moretta A, Bottino C, Mingari MC, Biassoni R, Moretta L. What is a natural killer cell?
- 551 *Nat Immunol.* 2002;3(1):6-8.
- 552 2. Cooper MA, Fehniger TA, Caligiuri MA. The biology of human natural killer-cell subsets.
- 553 *Trends Immunol.* 2001;22:633-640.
- 554 3. Poli A, Michel T, Thérésine M, Andrès E, Hentges F, Zimmer J. CD56bright natural killer
- 555 (NK) cells: an important NK cell subset. *Immunology.* 2009;126:458-465.
- 556 4. Michel T, Poli A, Cuapio A, et al. Human CD56 bright NK Cells: An Update. *J Immunol.*
- 557 2016;196:2923-2931.
- 558 5. Freud AG, Yokohama A, Becknell B, et al. Evidence for discrete stages of human natural
- 559 killer cell differentiation in vivo. *J Exp Med.* 2006;203(4):1033-1043.
- 560 6. Mace EM, Hsu AP, Monaco-Shawver L, et al. Mutations in GATA2 cause human NK cell
- 561 deficiency with specific loss of the CD56bright subset. *Blood.* 2013;121(14):2669-2678.
- 562 7. Maciejewski-Duval A, Meuris F, Bignon A, et al. Altered chemotactic response to
- 563 CXCL12 in patients carrying GATA2 mutations. *J Leukoc Biol.* 2016;99:1065-1076.
- 564 8. Gineau L, Cognet C, Kara N, et al. Partial MCM4 deficiency in patients with growth
- 565 retardation, adrenal insufficiency, and natural killer cell deficiency. *J Clin Invest.*
- 566 2012;122(3):821-832.
- 567 9. Wu C, Li B, Lu R, et al. Clonal tracking of rhesus macaque hematopoiesis highlights a
- 568 distinct lineage origin for natural killer cells. *Cell Stem Cell.* 2014;14(4):486-499.
- 569 10. Goodridge JP, Önfelt B, Malmberg K-J. Newtonian cell interactions shape natural killer
- 570 cell education. *Immunol Rev.* 2015;267:197-213.
- 571 11. Horowitz A, Strauss-Albee DM, Leipold M, et al. Genetic and environmental determinants

- 572 of human NK cell diversity revealed by mass cytometry. *Sci Transl Med*. 2013;5(208):1-  
573 12.
- 574 12. Elliott JM, Wahle JA, Yokoyama WM. MHC class I–deficient natural killer cells acquire a  
575 licensed phenotype after transfer into an MHC class I–sufficient environment. *J Exp Med*.  
576 2010;207(10):2073-2079.
- 577 13. Björkström NK, Riese P, Heuts F, et al. Expression patterns of NKG2A, KIR, and CD57  
578 define a process of CD56dim NK-cell differentiation uncoupled from NK-cell education.  
579 *Blood*. 2010;116(19):3853-3864.
- 580 14. Sun JC, Beilke JN, Lanier LL. Adaptive immune features of natural killer cells. *Nature*.  
581 2009;457:557-561.
- 582 15. Gordon SM, Chaix J, Rupp LJ, et al. The Transcription Factors T-bet and Eomes Control  
583 Key Checkpoints of Natural Killer Cell Maturation. *Immunity*. 2012;36:55-67.
- 584 16. Ranson T, Vosshenrich CAJ, Corcuff E, et al. IL-15 availability conditions homeostasis of  
585 peripheral natural killer T cells. *Proc Natl Acad Sci U S A*. 2003;100(5):2663-2668.
- 586 17. Crinier A, Milpied P, Escalière B, et al. High-Dimensional Single-Cell Analysis Identifies  
587 Organ-Specific Signatures and Conserved NK Cell Subsets in Humans and Mice.  
588 *Immunity*. 2018;49:1-16.
- 589 18. Collins PL, Cella M, Porter SI, et al. Gene Regulatory Programs Conferring Phenotypic  
590 Identities to Human NK Cells. *Cell*. 2019;176(1-2):348-360.
- 591 19. Schlums H, Cichocki F, Tesi B, et al. Cytomegalovirus Infection Drives Adaptive  
592 Epigenetic Diversification of NK Cells with Altered Signaling and Effector Function.  
593 *Immunity*. 2015;42(3):443-456.
- 594 20. Lau CM, Adams NM, Geary CD, et al. Epigenetic control of innate and adaptive immune  
595 memory. *Nat Immunol*. 2018;19:963-972.

- 596 21. Wiencke JK, Butler R, Hsuang G, et al. The DNA methylation profile of activated human  
597 natural killer cells. *Epigenetics*. 2016;11(5):363-380.
- 598 22. Björkström NK, Riese P, Heuts F, et al. Expression patterns of NKG2A, KIR, and CD57  
599 define a process of CD56dim NK cell differentiation uncoupled from NK-cell education.  
600 *Blood*. 2010;116(19):3853-3864.
- 601 23. Goodridge JP, Jacobs B, Saetersmoen ML, et al. Remodeling of secretory lysosomes  
602 during education tunes functional potential in NK cells. *Nat Commun*. 2019;10:1-15.
- 603 24. La Manno G, Soldatov R, Zeisel A, et al. RNA velocity of single cells. *Nature*.  
604 2018;560(7719):494-498.
- 605 25. Setty M, Kisieliovas V, Levine J, Gayoso A, Mazutis L, Pe'er D. Palantir characterizes cell  
606 fate continuities in human hematopoiesis. *BioRxiv*. 2018.
- 607 26. Sterea AM, Almasi S, El Hiani Y. The hidden potential of lysosomal ion channels: A new  
608 era of oncogenes. *Cell Calcium*. 2018;72(January):91-103.
- 609 27. Liu LL, Pfefferle A, Yi Sheng VO, et al. Harnessing adaptive natural killer cells in cancer  
610 immunotherapy. *Mol Oncol*. 2015;9(10):1904-1917.
- 611 28. Pfefferle A, Jacobs B, Ask EH, et al. Intra-lineage Plasticity and Functional  
612 Reprogramming Maintain Natural Killer Cell Repertoire Diversity. *bioRxiv*. 2019:1-45.
- 613 29. Mace EM, Gunesch JT, Dixon A, Orange JS. Human NK cell development requires  
614 CD56-mediated motility and formation of the developmental synapse. *Nat Commun*.  
615 2016;7(12171):1-13.
- 616 30. Béziat V, Duffy D, Nguyen Quoc S, et al. CD56brightCD16+ NK Cells: A Functional  
617 Intermediate Stage of NK Cell Differentiation. *J Immunol*. 2011;186:6753-6761.
- 618 31. Chiang SCC, Wood SM, Tesi B, et al. Differences in granule morphology yet equally  
619 impaired exocytosis among cytotoxic T cells and NK cells from Chediak-Higashi

- 620 syndrome patients. *Front Immunol.* 2017;8:1-15.
- 621 32. Jessen B, Maul-Pavicic A, Ufheil H, et al. Subtle differences in CTL cytotoxicity  
622 determine susceptibility to hemophagocytic lymphohistiocytosis in mice and humans with  
623 Chediak-Higashi syndrome. *Blood.* 2011;118(17):4620-4629.
- 624 33. Matalon O, Barda-Saad M. Cbl ubiquitin ligases mediate the inhibition of natural killer  
625 cell activity. *Commun Integr Biol.* 2016;9(6):1-4.
- 626 34. Holmes VM, De Motes CM, Richards PT, et al. Interaction between nectin-1 and the  
627 human natural killer cell receptor CD96. *PLoS One.* 2019;14(2):1-19.
- 628 35. Chan CJ, Martinet L, Gilfillan S, et al. The receptors CD96 and CD226 oppose each other  
629 in the regulation of natural killer cell functions. *Nat Immunol.* 2014;15(5):431-438.
- 630 36. Kurioka A, Cosgrove C, Simoni Y, et al. CD161 defines a functionally distinct subset of  
631 pro-inflammatory natural killer cells. *Front Immunol.* 2018;9(486):1-14.
- 632 37. Marrufo AM, Mathew SO, Chaudhary P, Malaer JD, Vishwanatha JK, Mathew PA.  
633 Blocking LLT1 (CLEC2D, OCIL)-NKR1A (CD161) interaction enhances natural killer  
634 cell-mediated lysis of triple-negative breast cancer cells. *Am J Cancer Res.*  
635 2018;8(6):1050-1063.
- 636 38. Raab M, Strebhardt K, Rudd CE. Immune adaptor protein SKAP1 (SKAP-55) forms  
637 homodimers as mediated by the N-terminal region. *BMC Res Notes.* 2018;11(869):1-5.
- 638 39. Enqvist M, Ask EH, Forslund E, et al. Coordinated Expression of DNAM-1 and LFA-1 in  
639 Educated NK Cells. *J Immunol.* 2015;194:4518-4527.
- 640 40. Oykhman P, Timm-McCann M, Xiang RF, et al. Requirement and Redundancy of the Src  
641 Family Kinases Fyn and Lyn in Perforin-Dependent Killing of *Cryptococcus neoformans*  
642 by NK Cells. *Infect Immun.* 2013;81(10):3912-3922.
- 643 41. Boggs SS, Trevisan M, Patrene K, Geogopoulos K. Lack of natural killer cell precursors in

- 644 fetal liver of Ikaros knockout mutant mice. *Nat Immun.* 1998;16:137-145.
- 645 42. Fehniger TA, Cai SF, Cao X, et al. Article Acquisition of Murine NK Cell Cytotoxicity  
646 Requires the Translation of a Pre-existing Pool of Granzyme B and Perforin mRNAs.  
647 *Immunity.* 2007;26:298-811.
- 648 43. Salcedo T, Azzoni L, Wolf S, Perussia B. Modulation of perforin and granzyme messenger  
649 RNA expression in human natural killer cells. *J Immunol.* 1993;151:2511-2520.
- 650 44. Huang C, Bi E, Hu Y, et al. A Novel NF- $\kappa$ B Binding Site Controls Human Granzyme B  
651 Gene Transcription. *J Immunol.* 2006;176:4173-4181.
- 652 45. Liu CC, Perussia B, Young JDE. The emerging role of IL-15 in NK-cell development.  
653 *Trends Immunol Today.* 2000;21(3):113-116.
- 654 46. Suzuki H, Duncan GS, Takimoto H, Mak TW. Abnormal Development of Intestinal  
655 Intraepithelial Lymphocytes and Peripheral Natural Killer Cells in Mice Lacking the IL-2  
656 Receptor  $\beta$  Chain. *J Exp Med.* 1997;185(3):499-506.
- 657 47. Andrews TS, Hemberg M. False signals induced by single-cell imputation.  
658 *F1000Research.* 2018;7(1740):1-29.
- 659 48. Levanon D, Negreanu V, Lotem J, et al. Transcription Factor Runx3 Regulates  
660 Interleukin-15-Dependent Natural Killer Cell Activation. *Mol Cell Biol.* 2014;34(6):1158-  
661 1169.
- 662 49. Delconte RB, Kolesnik TB, Dagley LF, et al. CIS is a potent checkpoint in NK cell-  
663 mediated tumor immunity. *Nat Immunol.* 2016;17(7):816-824.
- 664 50. Holmes ML, Huntington ND, Thong RP, et al. Peripheral natural killer cell maturation  
665 depends on the transcription factor Aiolos. *EMBO J.* 2014;33(22):2721-2734.
- 666 51. Knox JJ, Cosma GL, Betts MR, Mclane LM. Characterization of T-bet and Eomes in  
667 peripheral human immune cells. *Front Immunol.* 2014;5:1-13.

- 668 52. Shao J, Yin W, Zhang Q, et al. Siglec-7 Defines a Highly Functional Natural Killer Cell  
669 Subset and Inhibits Cell-Mediated Activities. *Scand J Immunol.* 2016;84(3):182-190.
- 670 53. Jacobs B, Pfefferle A, Clement D, et al. Induction of the BIM Short Splice Variant  
671 Sensitizes Proliferating NK Cells to IL-15 Withdrawal. *J Immunol.* 2019;202(3):736-746.
- 672 54. Guia S, Jaeger BN, Piatek S, et al. Confinement of activating receptors at the plasma  
673 membrane controls natural killer cell tolerance. *Sci Signal.* 2011;4(167):1-12.
- 674 55. Islam S, Kjällquist U, Moliner A, et al. Characterization of the single-cell transcriptional  
675 landscape by highly multiplex RNA-seq. *Genome Res.* 2011;21:1160-1167.
- 676 56. Becht E, McInnes L, Healy J, et al. Dimensionality reduction for visualizing single-cell  
677 data using UMAP. *Nat Biotechnol.* 2019;37(1):38-45.
- 678 57. van der Maaten L, Hinton G. Visualizing Data using t-SNE. *J Mach Learn Res.*  
679 2008;9:2579-2605.
- 680 58. van Dijk D, Sharma R, Nainys J, et al. Recovering Gene Interactions from Single-Cell  
681 Data Using Data Diffusion. *Cell.* 2018;174(3):716-729.
- 682 59. Levine JH, Simonds EF, Bendall SC, et al. Data-driven phenotypic dissection of AML  
683 reveals progenitor-like cells that correlate with prognosis. *Cell.* 2015;162(1):184-197.
- 684 60. Kharchenko P V, Silberstein L, Scadden DT. Bayesian approach to single-cell differential  
685 expression analysis. *Nat Methods.* 2014;11(7):18-22.
- 686 61. Buettner F, Pratanwanich N, McCarthy DJ, Marioni JC, Stegle O. f-scLVM: Scalable and  
687 versatile factor analysis for single-cell RNA-seq. *Genome Biol.* 2017;18(212):1-13.
- 688



## Figure 1

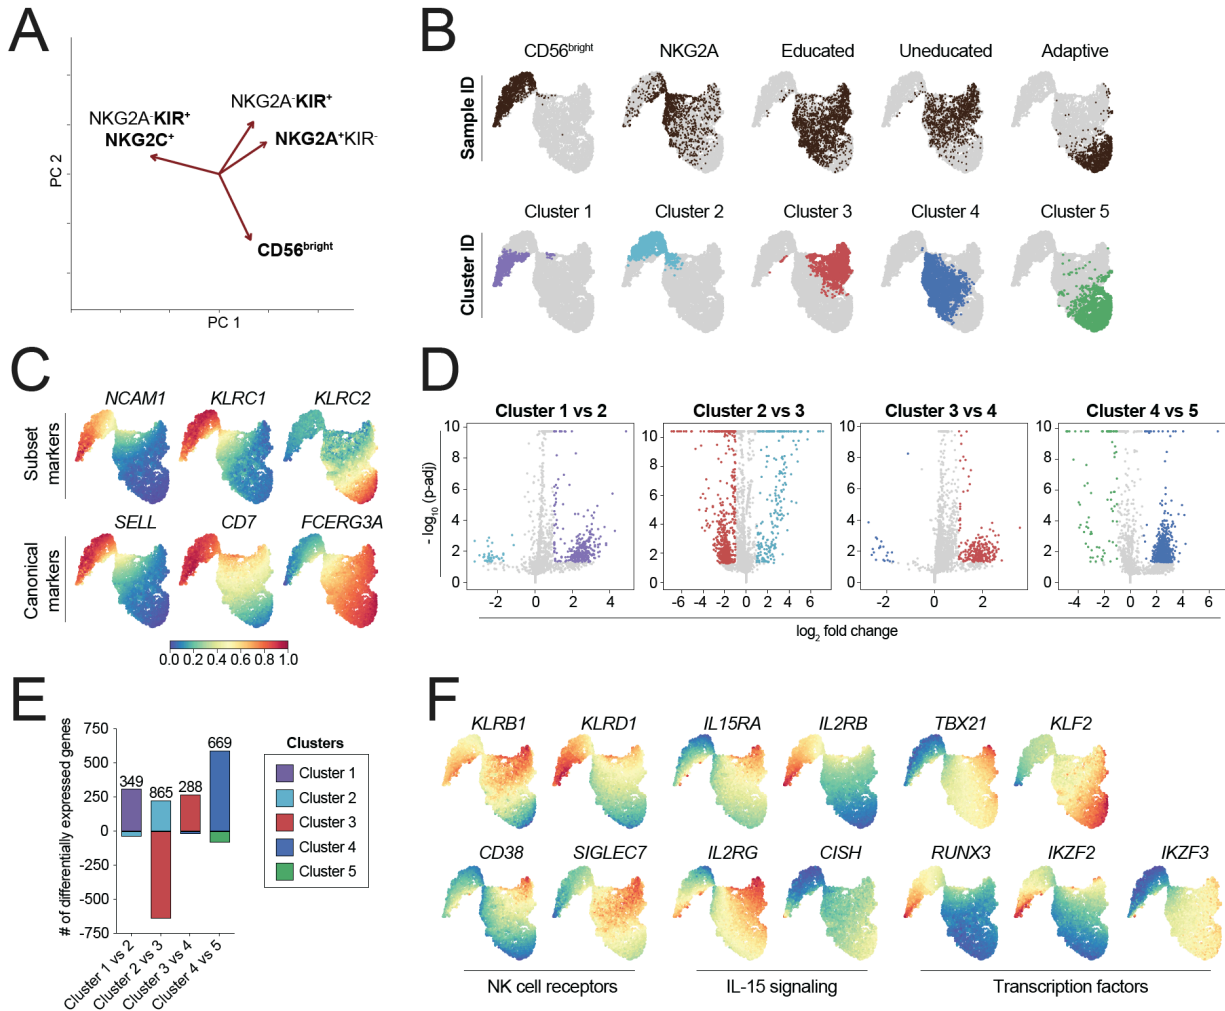

689

690

### 691 **Figure 1: NK cell differentiation defined through bulk and single cell RNA-seq**

692 (A) PCA plot of bulk RNA seq data of four discrete NK cell differentiation stages. (B) t-SNE plot

693 of scRNA-seq data of five sorted NK cell subsets (CD56<sup>bright</sup>, NKG2A<sup>+</sup> KIR<sup>-</sup> CD57<sup>-</sup> CD56<sup>dim</sup>,

694 NKG2A<sup>-</sup> self KIR<sup>+</sup> CD57<sup>-</sup> CD56<sup>dim</sup>, NKG2A<sup>-</sup> non-self KIR<sup>+</sup> CD57<sup>-</sup> CD56<sup>dim</sup>, NKG2A<sup>+</sup> self KIR<sup>+</sup>

695 CD57<sup>+</sup> NKG2C<sup>+</sup> CD56<sup>dim</sup>) showing transcriptional location of sorted subsets (top row) and

696 PhenoGraph defined transcriptional clusters (bottom row). (C) Gene expression of selected genes

697 displayed as a heatmap on the t-SNE plot. (D) Volcano plots and (E) summary of the number of

- 698 differentially expressed genes of four comparisons between individual PhenoGraph clusters. (F)
- 699 Gene expression of selected genes displayed as a heatmap on the t-SNE plot.

700

## Figure 2

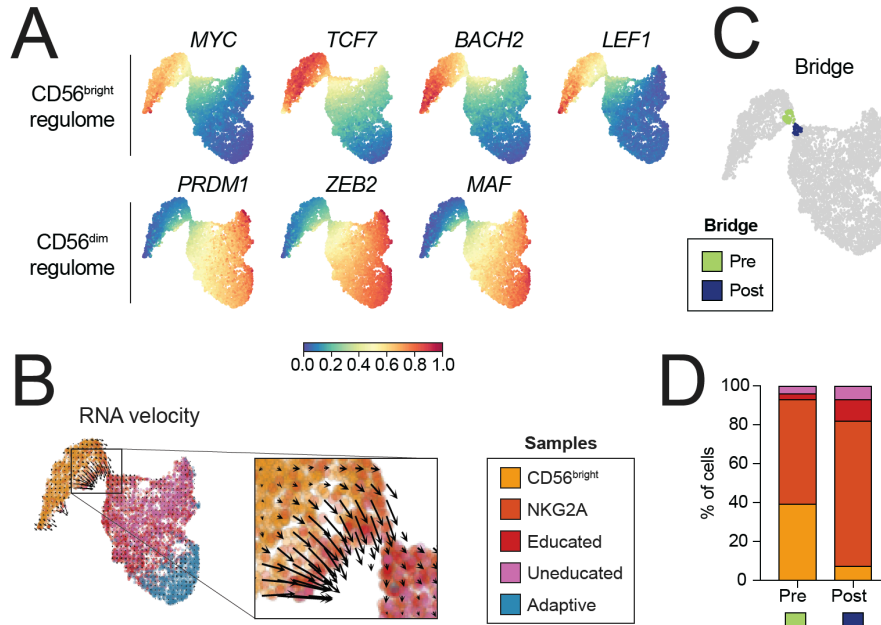

701

702

703

704 **Figure 2: Transitioning from CD56<sup>bright</sup> to CD56<sup>dim</sup> NK cells**

705 (A) Gene expression of selected genes displayed as a heatmap on the t-SNE plot. (B) t-SNE

706 showing sample ID of sorted subsets with the RNA velocity vector overlaid and magnification of

707 the bridge region exhibiting high RNA velocity. (C) Pre (green) and post (blue) bridge region

708 clusters consisting of 100 cells each and defined based on their proximity to the bridge. (D)

709 Frequency of how much each sorted subset contributes to the custom defined bridge clusters.

## Figure 3

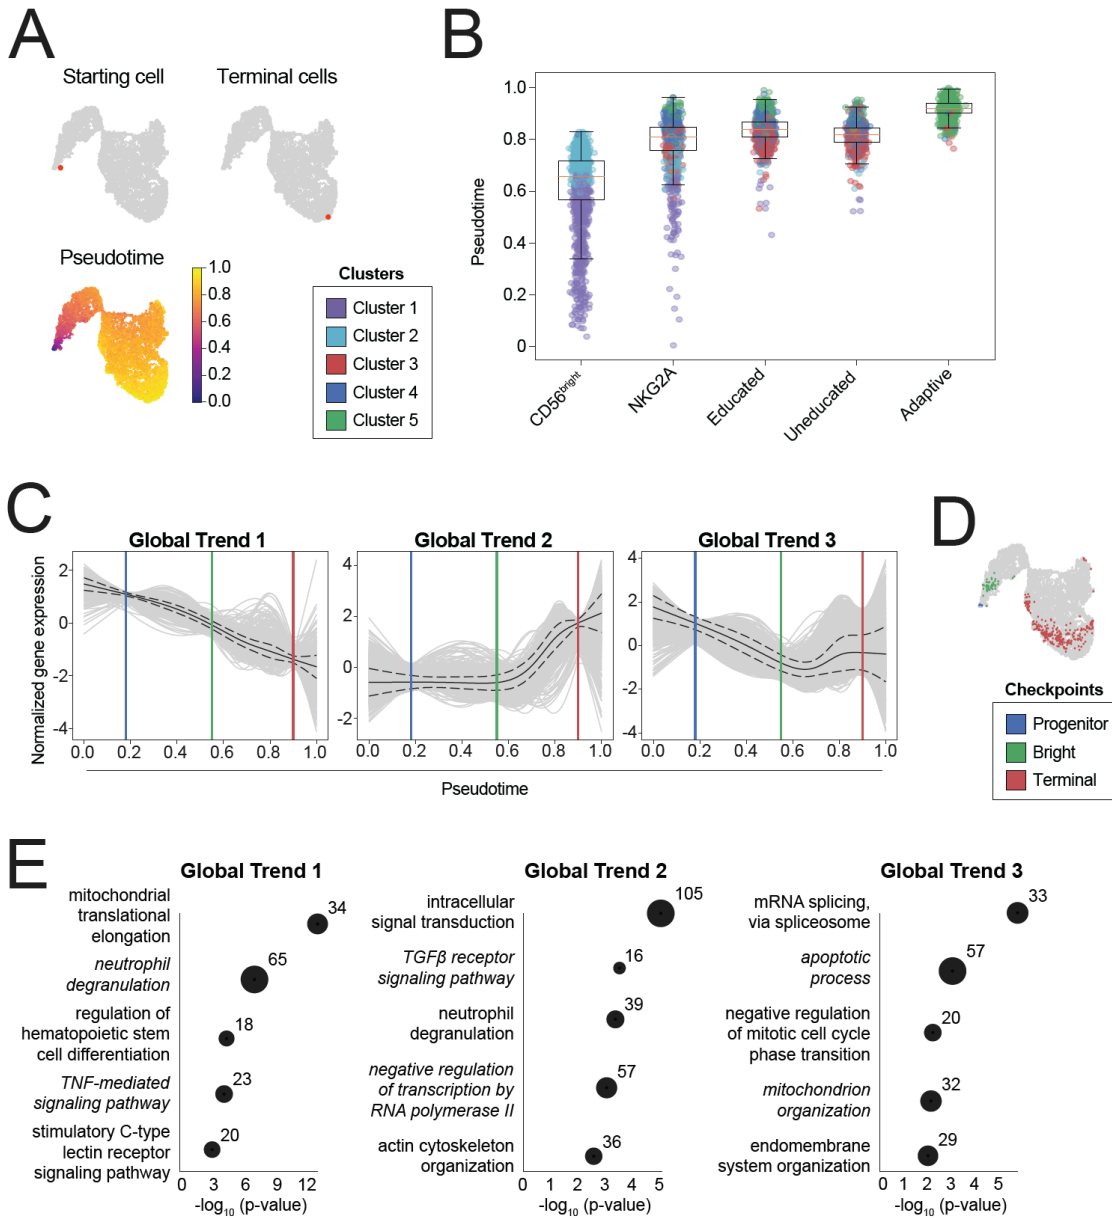

710

711

712 **Figure 3: Differentiation checkpoints at distinct stages of pseudotime**

713 (A) Starting cell (highest MYC expression), terminal cell and pseudotime as calculated using the

714 Palantir algorithm. (B) Distribution of each sorted subset in pseudotime with colors denoting the

715 PhenoGraph clusters each cell identifies with (box limits, upper and lower quartiles; center line,

716 median; whiskers, quartile 1 - 1.5 \* inter quartile range to quartile 3 + 1.5 \* inter quartile range;

717 points, outliers). (C) Global gene trends mapped onto pseudotime with colored lines denoting

718 transcriptional checkpoints defined by low standard deviation (blue = progenitor, green = bright,

719 red = terminal). (D) Visualization of cells corresponding to each checkpoint identified in

720 pseudotime. (E) Gene set enrichment analysis of selected significant gene ontology (GO) terms

721 associated with each gene trend. Significance was calculated using Fisher's exact test followed by

722 false discovery rate correction of the p-value. A negative  $\log_{10}$  value of the false discovery rate

723 adjusted p-value  $> 1.3$  is deemed significant.

724

## Figure 4

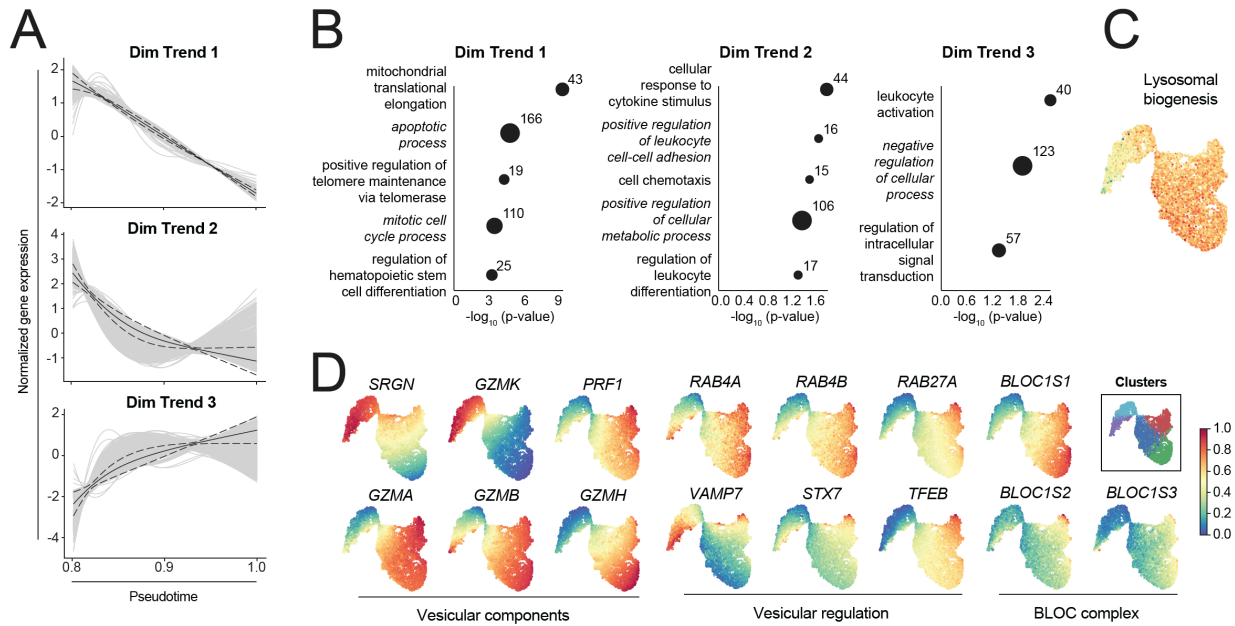

725

726

727

728 **Figure 4: Establishment of a functional template during CD56<sup>dim</sup> NK cell differentiation**

729 (A) Dim gene trends mapped onto pseudotime, only taking pseudotime > 80% into account.

730 (B) Gene set enrichment analysis of selected significant gene ontology (GO) terms associated with

731 each gene trend. (C) Factor analysis of genes associated with lysosomal biogenesis. (D) Gene

732 expression of selected genes displayed as a heatmap on the t-SNE plot. Significance was calculated

733 using Fisher's exact test followed by false discovery rate correction of the p-value. A negative log<sub>10</sub>

734 value of the false discovery rate adjusted p-value > 1.3 is deemed significant. Numbers in the plot

735 represent number of genes identified within each GO term based on the DEGs analyzed.
